# Supplementary material for: A novel formamidase is required for riboflavin biosynthesis in invasive bacteria
Source: PubMed Central journal article supplement (PMC9478397; doi:10.1016/j.jbc.2022.102377), 2022-08-13
Supplement: mmc1.pdf [file mmc1.pdf]

Table S1. *S. meliloti* and *B. abortus rib* mutants

| Strain name                                               | Genotype                                                                             | Requirement of RF for growth |
|-----------------------------------------------------------|--------------------------------------------------------------------------------------|------------------------------|
| Rm1021                                                    | Wild type <i>S. meliloti</i>                                                         | No                           |
| Rm1021 $\Delta$ <i>ribBA</i> -RFA-12                      | SMc02977-3098741*:: <i>Tn5</i> -mini mutant of Rm1021 $\Delta$ <i>ribBA</i>          | Yes                          |
| Rm1021 $\Delta$ <i>ribBA</i> -RFA- $\Sigma$               | SMc02977-3098830:: <i>Tn5</i> -mini mutant of Rm1021 $\Delta$ <i>ribBA</i>           | Yes                          |
| Td-Rm1021-RFA-12                                          | Transductant of SMc02977-3098741:: <i>Tn5</i> into Rm1021                            | Yes                          |
| Td-Rm1021-RFA- $\Sigma$                                   | Transductant of SMc02977-3098830:: <i>Tn5</i> into Rm1021                            | Yes                          |
| Rm1021 $\Delta$ SMc02977                                  | SMc02977 deletion mutant of Rm1021                                                   | Yes                          |
| Rm1021 $\Delta$ <i>ribBA</i> $\Delta$ SMc02977            | SMc02977 deletion mutant of Rm1021 $\Delta$ <i>ribBA</i>                             | Yes                          |
| Rm1021 $\Delta$ SMc02977(pCPP- <i>Ba-bab2_0247</i> -expr) | Rm1021 $\Delta$ SMc02977 overexpressing SMc02977 homolog from <i>B. abortus</i>      | No                           |
| Rm1021 $\Delta$ SMc02977(pCPP- <i>Ls-ckc_00410</i> -expr) | Rm1021 $\Delta$ SMc02977 overexpressing SMc02977 homolog from <i>L. solanacearum</i> | No                           |
| Rm1021 $\Delta$ SMc02977(pCPP- <i>Me-metdi4691</i> -expr) | Rm1021 $\Delta$ SMc02977 overexpressing SMc02977 homolog from <i>M. extorquens</i>   | Yes                          |
| Rm1021 $\Delta$ SMc02977(pCPP- <i>Oa_Oant_3869</i> -expr) | Rm1021 $\Delta$ SMc02977 overexpressing SMc02977 homolog from <i>O. anthropi</i>     | Yes                          |
| Rm1021 $\Delta$ SMc02976                                  | SMc02976 deletion mutant of Rm1021                                                   | No                           |
| Rm1021 $\Delta$ SMc02978                                  | SMc02978 deletion mutant of Rm1021                                                   | No                           |
| JB32                                                      | <i>bab2_0247</i> deletion mutant of Ba 2308                                          | Yes                          |
| JB24                                                      | <i>bab1_0455</i> deletion mutant of Ba 2308                                          | No                           |

\*The numbers indicate the position of the transition from the *Tn5* shoulder to the *S. meliloti* Rm1021 sequence
