# Supplementary material for: A novel formamidase is required for riboflavin biosynthesis in invasive bacteria
Source: PubMed Central journal article supplement (PMC9478397; doi:10.1016/j.jbc.2022.102377), 2022-08-13
Supplement: mmc2.pdf [file mmc2.pdf]

**Table S2.** Bacterial strains and plasmids.

| Strains                                     | Genotype or characteristics                                                       | Source                        |
|---------------------------------------------|-----------------------------------------------------------------------------------|-------------------------------|
| <i>Sinorhizobium meliloti</i>               |                                                                                   |                               |
| Rm1021                                      | Wild type                                                                         | (Galibert, Finan et al. 2001) |
| Rm1021 $\Delta$ <i>ribBA</i>                | <i>ribBA</i> deletion mutant of Rm1021                                            | (Yurgel, Rice et al. 2014)    |
| Rm1021 $\Delta$ <i>ribBA</i> -RFA-12        | SMc02977-3098741*::Tn5-mini mutant of Rm1021 $\Delta$ <i>ribBA</i> , RF auxotroph | This work                     |
| Rm1021 $\Delta$ <i>ribBA</i> -RFA- $\Sigma$ | SMc02977-3098830::Tn5-mini mutant of Rm1021 $\Delta$ <i>ribBA</i> , RF auxotroph  | This work                     |
| Td-Rm1021-RFA-12                            | Transductant of SMC02977-3098741::Tn5 into Rm1021, RF auxotroph                   | This work                     |
| Td-Rm1021-RFA- $\Sigma$                     | Transductant of SMC02977-3098830::Tn5 into Rm1021, RF auxotroph                   | This work                     |
| Rm1021 $\Delta$ SMc02977                    | SMc02977 deletion mutant of Rm1021, RF auxotroph                                  | This work                     |
| Rm1021 $\Delta$ SMc02976                    | SMc02976 deletion mutant of Rm1021                                                | This work                     |
| Rm1021 $\Delta$ SMc02978                    | SMc02978 deletion mutant of Rm1021                                                | This work                     |
| <i>Brucella abortus</i>                     |                                                                                   |                               |
| <i>B. abortus</i> 2308                      | Wild type                                                                         |                               |
| JB32                                        | Bab2_0247(Sm-BrbF homolog) deletion in Ba2308, RF auxotroph                       | This work                     |
| JB24                                        | Bab1_0455(RibBA) deletion in Ba2308                                               | This work                     |
| <i>E. coli</i>                              |                                                                                   |                               |
| BL21                                        | <i>fhuA2 [lon] ompT gal [dcm] <math>\Delta</math>hsdS</i>                         | Invitrogen                    |
| S17-1                                       | <i>pro hsdR recA</i> [RP4-2(Tc::Mu) (Km::Tn7)]                                    | (Simon, Quandt et al. 1989)   |
| Plasmids                                    |                                                                                   |                               |
| pJG110                                      | Mini-Tn5/Tn5-110 transposon delivery vector (Km/NmR, ApR)                         | (Griffitts and Long 2008)     |
| pCPP30                                      | IncP LacZ; Tc                                                                     | (Huang, He et al. 1992)       |

|                                 |                                                                                      |                              |
|---------------------------------|--------------------------------------------------------------------------------------|------------------------------|
| pCPP-Ba- <i>bab2_0247</i> -expr | pCPP30[ <i>B. abortus</i> 2308 <i>bab2_0247</i> with 500 bp promoter region]         | This work                    |
| pCPP-Ls- <i>ckc_00410</i> -expr | pCPP30[ <i>L. solanacearum</i> <i>ckc_00410</i> with 500 bp promoter region]         | This work                    |
| pCPP-Me- <i>metdi4691</i> -expr | pCPP30[ <i>M. extorquens</i> METDI4691 with 500 bp promoter region of SMc02976]      | This work                    |
| pCPP-Oa- <i>Oant_3869</i> -expr | pCPP30[ <i>O. anthropi</i> <i>Oant_3869</i> with 500 bp promoter region of SMc02976] | This work                    |
| pK19 <i>mobsacB</i>             | pK19 <i>mob</i> derivative <i>sacB</i>                                               | (Schafer, Tauch et al. 1994) |
| pNPTS193                        | Cloning vector; contains <i>sacB</i> gene                                            | (Spratt, Hedge et al. 1986)  |
| pNPTSΔ0455                      | pNPTS193 [1000bp flanking <i>B. abortus</i> <i>bab1_0455</i> ]                       | This work                    |
| pNTPSΔ0247                      | pNPTS938 [1000bp flanking <i>B. abortus</i> <i>bab2_0247</i> ]                       | This work                    |
| pK19 <i>mobsacB</i> -ΔSMc02977  | pK19 <i>mobsacB</i> [500/600bp flanking <i>S. meliloti</i> Smc02977]                 | This work                    |
| pK19 <i>mobsacB</i> -ΔSMc02976  | pK19 <i>mobsacB</i> [500/600bp flanking <i>S. meliloti</i> Smc02976]                 | This work                    |
| pK19 <i>mobsacB</i> -ΔSMc02978  | pK19 <i>mobsacB</i> [500/600bp flanking <i>S. meliloti</i> Smc02978]                 | This work                    |
| LIC_SMc02977                    | pET-30 Ek/LIC, <i>S. meliloti</i> SMc02977 expression                                | This work                    |

\*The numbers indicate the position of the transition from the Tn5 shoulder to the *S. meliloti* Rm1021 sequence

Galibert, F., T. M. Finan, S. R. Long, A. Puhler, P. Abola, F. Ampe, F. Barloy-Hubler, M. J. Barnett, A. Becker, P. Boistard, G. Bothe, M. Boutry, L. Bowser, J. Buhrmester, E. Cadieu, D. Capela, P. Chain, A. Cowie, R. W. Davis, S. Dreano, N. A. Federspiel, R. F. Fisher, S. Gloux, T. Godrie, A. Goffeau, B. Golding, J. Gouzy, M. Gurjal, I. Hernandez-Lucas, A. Hong, L. Huizar, R. W. Hyman, T. Jones, D. Kahn, M. L. Kahn, S. Kalman, D. H. Keating, E. Kiss, C. Komp, V. Lelaure, D. Masuy, C. Palm, M. C. Peck, T. M. Pohl, D. Portetelle, B. Purnelle, U. Ramsperger, R. Surzycki, P. Thebault, M. Vandenbol, F. J. Vorholter, S. Weidner, D. H. Wells, K. Wong, K. C. Yeh and J. Batut (2001). "The composite genome of the legume symbiont *Sinorhizobium meliloti*." *Science* **293**(5530): 668-672.

Griffitts, J. S. and S. R. Long (2008). "A symbiotic mutant of *Sinorhizobium meliloti* reveals a novel genetic pathway involving succinoglycan biosynthetic functions." *Mol Microbiol* **67**(6): 1292-1306.

Huang, H. C., S. Y. He, D. W. Bauer and A. Collmer (1992). "The *Pseudomonas syringae* pv. *syringae* 61 hrpH product, an envelope protein required for elicitation of the hypersensitive response in plants." J Bacteriol **174**(21): 6878-6885.

Schafer, A., A. Tauch, W. Jager, J. Kalinowski, G. Thierbach and A. Puhler (1994). "Small mobilizable multi-purpose cloning vectors derived from the *Escherichia coli* plasmids pK18 and pK19: selection of defined deletions in the chromosome of *Corynebacterium glutamicum*." Gene **145**(1): 69-73.

Simon, R., J. Quandt and W. Klipp (1989). "New derivatives of transposon Tn5 suitable for mobilization of replicons, generation of operon fusions and induction of genes in gram-negative bacteria." Gene **80**(1): 161-169.

Spratt, B. G., P. J. Hedge, S. te Heesen, A. Edelman and J. K. Broome-Smith (1986). "Kanamycin-resistant vectors that are analogues of plasmids pUC8, pUC9, pEMBL8 and pEMBL9." Gene **41**(2-3): 337-342.

Yurgel, S. N., J. Rice, E. Domreis, J. Lynch, N. Sa, Z. Qamar, S. Rajamani, M. Gao, S. Roje and W. D. Bauer (2014). "Sinorhizobium meliloti flavin secretion and bacteria-host interaction: role of the bifunctional RibBA protein." Mol Plant Microbe Interact **27**(5): 437-445.
