# Supplementary material for: A novel formamidase is required for riboflavin biosynthesis in invasive bacteria
Source: PubMed Central journal article supplement (PMC9478397; doi:10.1016/j.jbc.2022.102377), 2022-08-13
Supplement: mmc3.pdf [file mmc3.pdf]

**Table S3.** Primers used in this study

The restriction sites are underlined.

| Name                | Sequence 5' -> 3'                              | Experiment                                                           |
|---------------------|------------------------------------------------|----------------------------------------------------------------------|
| SMc02977_del_F-1    | CATGGAATTCAGCTCTGTCAGATAGACCTTGGT              | SMc02977 in-frame deletion, <i>S. meliloti</i>                       |
| SMc02977_del_R_1    | CATGGGATCCTTCTACTCGGCCCTCGGCGTCGT              |                                                                      |
| SMc02977_del_F_2    | CATGGGATCCATGCCGGCGAGCTCGACTGA                 |                                                                      |
| SMc02977_del_R_2    | CATGGAATTCATCAGTCCTTCGACGACAC                  |                                                                      |
| SMc02977_ver_F      | CTTCCGCGATGATCTGCAGA                           |                                                                      |
| SMc02977_ver_R      | GCGTCGAAGCGTCCGGGACG                           |                                                                      |
| SMc02976_del_F-1    | CATGGAATTCGTTTCGACAGGCAGGAAGGTCACG             | SMc02976 In-frame deletion, <i>S. meliloti</i>                       |
| SMc02976_del_R_1    | CATGGGATCCTGGACCTCCCGCCGAATCCCCTACACT          |                                                                      |
| SMc02976_del_F_2    | CATGGGATCCTTGAGCCGGGGTTTGAGAACCG               |                                                                      |
| SMc02976_del_R_2    | CATGGAATTCACCGAGCTGCAGCAGCGTCTCGAT             |                                                                      |
| SMc02976_ver_F      | ACATCCATGTGTTTCGATCGAA                         |                                                                      |
| SMc02976_ver_R      | GATAGCGGGCGACATGATCAC                          |                                                                      |
| SMc02978_del_F-1    | CATGGAATTCGCGCTTTCCTTCAAGCATCTGC               | SMc02978 in-frame deletion, <i>S. meliloti</i>                       |
| SMc02978_del_R_1    | CATGGGATCCGGGAACCTCGAGGGTTGGCGAT               |                                                                      |
| SMc02978_del_F_2    | CATGGGATCCGGCATGATCCCGGAAGATGGCG               |                                                                      |
| SMc02978_del_R_2    | CATGGAATTCGTAGGCGTAAGCGACCGCACCTT              |                                                                      |
| SMc02978_ver_F      | CATCCGGACAAGGTGGATAT                           |                                                                      |
| SMc02978_ver_R      | GGACATGCGTCGTCTTGCCGT                          |                                                                      |
| BAB2_0247 Up Fwd    | TGATGGTGATGGTCATGCCC                           | BAB2_0247 in-frame deletion, <i>B. abortusi</i>                      |
| BAB2_0247 Up Rev    | AAAACATGACCGATCTGCGCGCATGAACATGATCCG<br>GCTG   |                                                                      |
| BAB2_0247 Dwn Fwd   | CAGCCGGATCATGTTTCATGCGCGCAGATCGGTCATGT<br>TTT  |                                                                      |
| BAB2_0247 Dwn Rev   | AACGCGAGGTACGAAGGCTC                           |                                                                      |
| BAB1_0455 Up Fwd    | TGCTTCCGGCGTGCTTCTG                            | BAB1_0455 in-frame deletion, <i>B. abortusi</i>                      |
| BAB1_0455 Up Rev    | TTGGGAGACATGCATTAGATCGCATCAACGACCTGTT<br>TCTGA |                                                                      |
| BAB1_0455 Dwn Fwd   | TCAGAAACAGGTCGTTGATGCGATCTAATGCATGTCT<br>CCCAA |                                                                      |
| BAB1_0455 Dwn Rev   | GACTCATCGAGATTGATCTC                           |                                                                      |
| Ls_ckc_00410_expr_F | ATGCGGATCCCGATAGCGGCTGCCATTGT                  | Functional complementation of SMc02977 in pCPP30, <i>S. meliloti</i> |
| Ls_ckc_00410_expr_R | ATGCGGATCCAGCGCTATCGGAACTATTC                  |                                                                      |
| BA_BAB2_0247_expr_F | ATGCAAGCTTGAAGCGCGCTTGACCACAAATCC              |                                                                      |
| BA_BAB2_0247_expr_R | ATGCAAGCTTTATCACACGCAGCCGGATCATGT              |                                                                      |
| Me_METDI4691_F      | CATGGAATTCGGATCCGACGATCTCGTCCTTCTTCT           |                                                                      |
| Me_METDI4691_R      | CATGGAATTCGGATCCTCAGGCTCCTGGCATGGGGA           |                                                                      |

|                      |                                           |                                                                  |
|----------------------|-------------------------------------------|------------------------------------------------------------------|
| Oa_Oant_3869_F       | ATGCGGATCCGGCGACGATCTCGTCCTTCT            |                                                                  |
| Oa_Oant_3869_R       | ATGCGGATCCTTACCAGGCTGGTTTGTGT             |                                                                  |
| PET30LIC_cahA_F      | GACGACGACAAGATGTCGTTGCCGAAGCCCCGATGG      | Cloning in pET30 for protein expression, <i>S. meliloti</i> ArfB |
| PET30LIC_cahA_R      | GAGGAGAAGCCCGGTCAGTCGAGCTCGCCGGCATCG<br>A |                                                                  |
| PET30LIC_BAB2_0247_F | GACGACGACAAGATGACCGATCTGCGATCAG           | Cloning in pET30 for protein expression, <i>B. abortus</i>       |
| PET30LIC_BAB2_0247_R | GAGGAGAAGCCCGGTCATGCCATCACTTTCGGGTTG      |                                                                  |
| Sm_SMc02977_BTH_F    | ATGCGGATCCCATGTCGTTGCCGAAGCCCCGAT         | Bacterial two hybrid experiments, <i>S. meliloti</i>             |
| Sm_SMc02977_BTH_R    | ATGCGGTACCCGGTCGAGCTCGCCGGCATCGA          |                                                                  |
| Ba_BAB2_0247_BTH_F   | ATGCGGATCCCATGACCGATCTGCGCGATCA           | Bacterial two hybrid experiments, <i>B. abortus</i>              |
| Ba_BAB2_0247_BTH_R   | ATGCGGTACCCGTGCCATCACTTTCGGGTTGA          |                                                                  |
