# Supplementary material for: A novel formamidase is required for riboflavin biosynthesis in invasive bacteria
Source: PubMed Central journal article supplement (PMC9478397; doi:10.1016/j.jbc.2022.102377), 2022-08-13
Supplement: mmc6.pdf [file mmc6.pdf]

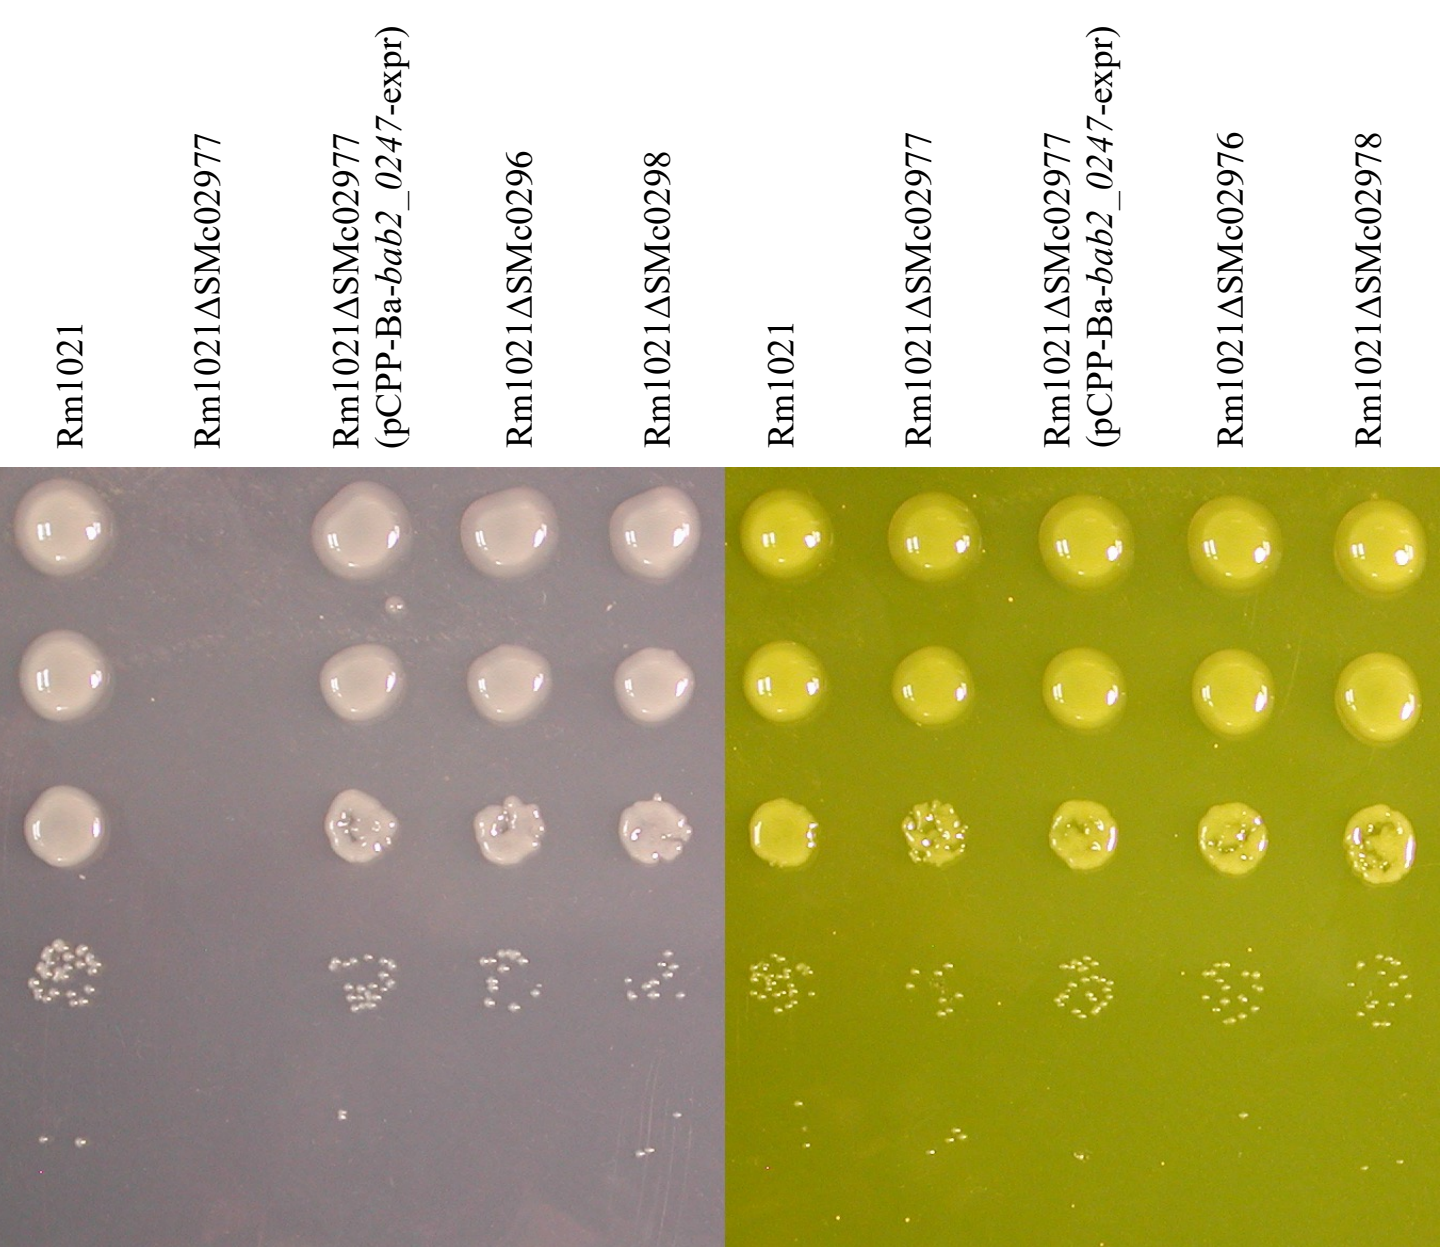

Fig. S3. Growth properties of Rm1021 strain.

Left panel – LB; Right panel – LB supplemented with 250 μM RF
