# Supplementary material for: A novel formamidase is required for riboflavin biosynthesis in invasive bacteria
Source: PubMed Central journal article supplement (PMC9478397; doi:10.1016/j.jbc.2022.102377), 2022-08-13

Fig. S4. Reactions catalyzed by GCHII (right panel, KEGG Reaction R00425) and creatininase (left panel, KEGG Reaction R01884).

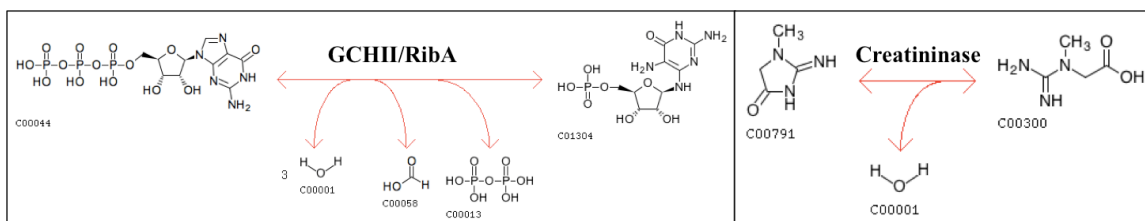

Supplement: mmc7.pdf [file mmc7.pdf]
