# Supplementary material for: A novel formamidase is required for riboflavin biosynthesis in invasive bacteria
Source: PubMed Central journal article supplement (PMC9478397; doi:10.1016/j.jbc.2022.102377), 2022-08-13
Supplement: mmc8.pdf [file mmc8.pdf]

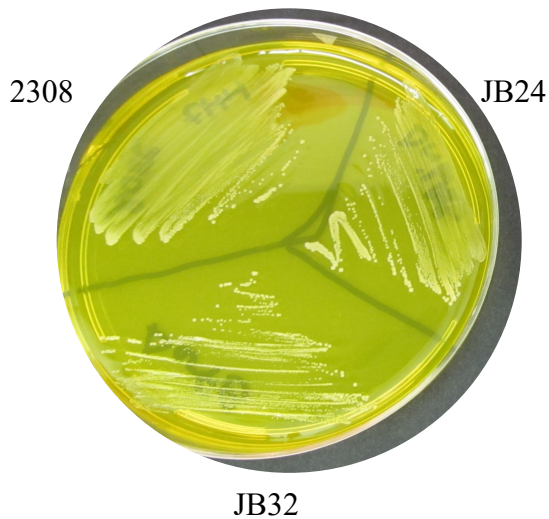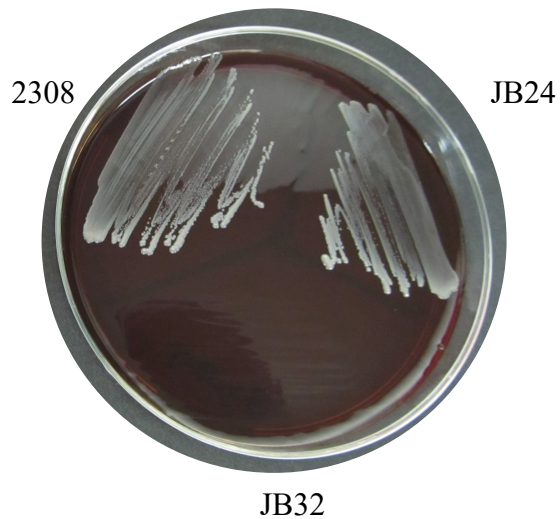

Fig. S5. Growth properties of *B. abortus* strains.

Left panel – SA media supplemented with 250  $\mu$ M RF; Right panel – SBA media
