# Supplementary material for: A novel formamidase is required for riboflavin biosynthesis in invasive bacteria
Source: PubMed Central journal article supplement (PMC9478397; doi:10.1016/j.jbc.2022.102377), 2022-08-13
Supplement: mmc9.pdf [file mmc9.pdf]

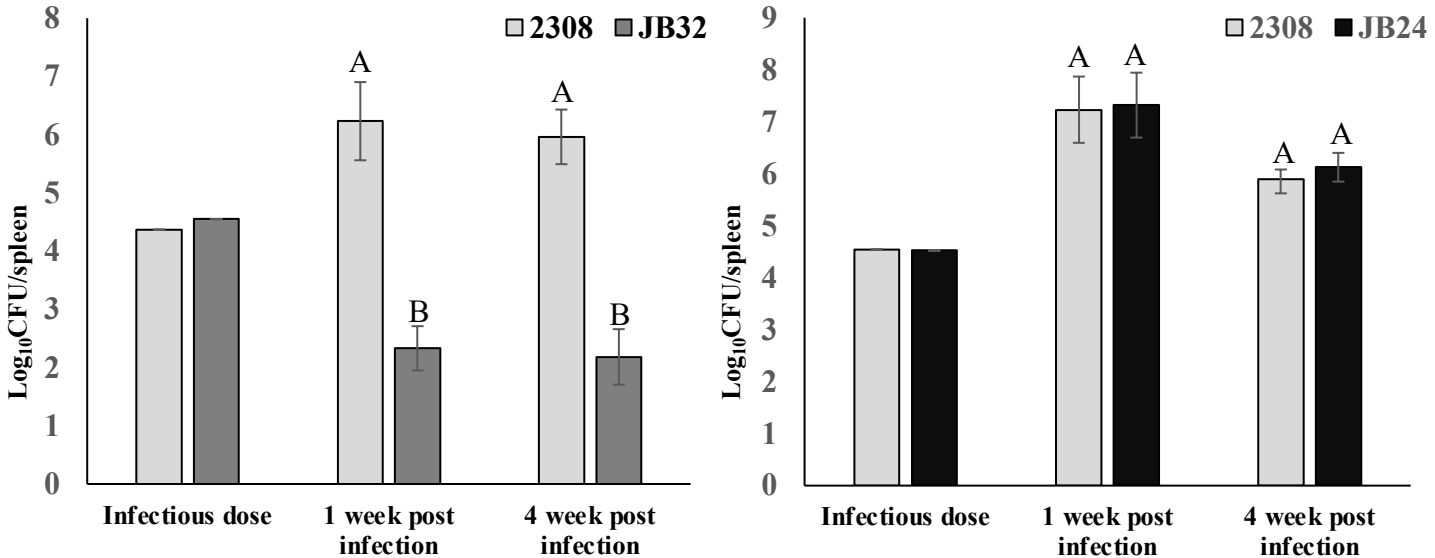

Fig. S6. The *B. abortus arfB* mutant displays attenuation in mice. Spleen colonization profiles of *Brucella abortus* 2308, the *arfB* mutant (JB32, left panel), and *ribBA* mutant (JB24, right panel) in *C57BL/6<sup>Nramp1+/+</sup>* mice are shown. Ten mice were individually infected with each bacterial strain via the intraperitoneal route, and five mice from each experimental group were evaluated at 1 weeks and 4 weeks post-infection. The values within each time point group labelled with the different letters are significantly different based on Student's T-Test, p-value < 0.001. Data are the average  $\pm$  standard deviation (SD). Three biological replicates were used for each measurement.
